# Supplementary material
Source: Springer Nature journal article supplement (https://www.springermedizin.de/resource/supplementary/13041_2013_213_MOESM6_ESM.pdf/25657754)

5-HT<sub>7</sub> Receptor

NMDAR

PDGFRs

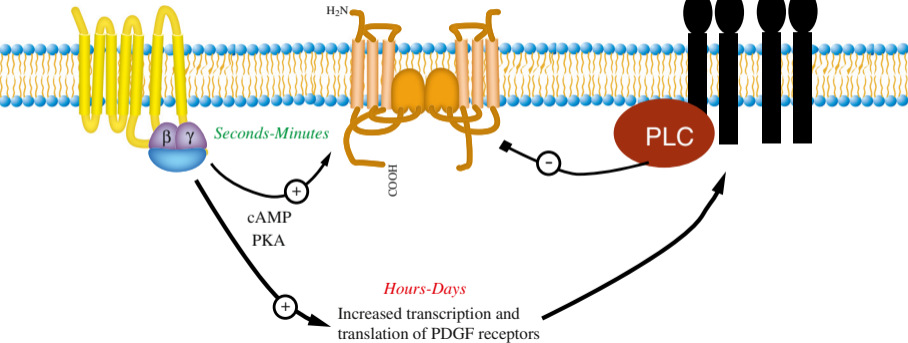

Supplement: MOESM6 [file 25657754]
